# Supplementary material for: Strategies for the release of dipeptidyl peptidase IV (DPP-IV) inhibitory peptides in an enzymatic hydrolyzate of α-lactalbumin
Source: Royal Society of Chemistry journal article supplement (doi:10.1039/c6fo00239k), 2016-01-01
Supplement: c6fo00239k1.pdf [file c6fo00239k1.pdf]

## Supplementary data

**Supplementary Table S1.** Details of the hydrolysis parameters used to generate the hydrolyzate samples, including the parameters used in the experimental design (hydrolyzates highlighted in grey) applied during  $\alpha$ -lactalbumin ( $\alpha$ -La) hydrolysis with elastase.

| Experiment | Hydrolysis conditions with elastase |                  |         |
|------------|-------------------------------------|------------------|---------|
|            | pH                                  | Temperature (°C) | E:S (%) |
| H1         | 7.0 (-1)                            | 37 (-1)          | 1.0 (-  |
| H2         | 7.0 (-1)                            | 37 (-1)          | 2.0     |
| H3         | 8.5 (1)                             | 37 (-1)          | 1.0 (-  |
| H4         | 8.5 (1)                             | 37 (-1)          | 2.0     |
| H5         | 7.8 (0)                             | 44 (0)           | 1.5     |
| H6         | 7.0 (-1)                            | 50 (1)           | 1.0 (-  |
| H7         | 7.0 (-1)                            | 50 (1)           | 2.0     |
| H8         | 8.5 (1)                             | 50 (1)           | 1.0 (-  |
| H9         | 8.5 (1)                             | 50 (1)           | 2.0     |

**Supplementary Table S2.** Results of the *in silico* digestion of  $\alpha$ -lactalbumin ( $\alpha$ -La) with pepsin, trypsin, chymotrypsin and glutamyl endopeptidase.

| Enzyme* | Peptide sequence**                         | Previously identified DPP-IV inhibitor |
|---------|--------------------------------------------|----------------------------------------|
| PEPS    | EQL                                        |                                        |
| PEPS    | TKCEV                                      |                                        |
| PEPS    | RE                                         | ✓                                      |
| PEPS    | LKD                                        |                                        |
| PEPS    | LKG                                        |                                        |
| PEPS    | YGGVSL                                     |                                        |
| PEPS    | PEW                                        |                                        |
| PEPS    | VCTT                                       |                                        |
| PEPS    | HTSG                                       |                                        |
| PEPS    | DTQAIVQNNNDSTE                             |                                        |
| PEPS    | QINNKI                                     |                                        |
| PEPS    | WCKDDQNPSSNICNISCDK                        |                                        |
| PEPS    | LDDD                                       |                                        |
| PEPS    | TDDIMCVKKILDKVGIN                          |                                        |
| PEPS    | AHKALCSEK                                  |                                        |
| PEPS    | DQ                                         | ✓                                      |
| PEPS    | CEKL                                       |                                        |
| PEPS2   | EQL                                        |                                        |
| PEPS2   | TKCEV                                      |                                        |
| PEPS2   | RE                                         | ✓                                      |
| PEPS2   | LKD                                        |                                        |
| PEPS2   | LKGYGGVSL                                  |                                        |
| PEPS2   | PEWVCTT                                    |                                        |
| PEPS2   | HTSGYDTQAIVQNNNDSTEYG                      |                                        |
| PEPS2   | QINNKIWCKDDQNPSSNICNISCDK                  |                                        |
| PEPS2   | LDDD                                       |                                        |
| PEPS2   | TDDIMCVKKILDKVGINYW                        |                                        |
| PEPS2   | AHKALCSEK                                  |                                        |
| PEPS2   | DQW                                        |                                        |
| PEPS2   | CEKL                                       |                                        |
| TRYPS   | EQLTK                                      |                                        |
| TRYPS   | CEVFR                                      |                                        |
| TRYPS   | ELK                                        |                                        |
| TRYPS   | DLK                                        |                                        |
| TRYPS   | GYGGVSLPEWVCTTFHTSGYDTQAIVQNNNDSTEYGLFQINN |                                        |
| TRYPS   | IWCK                                       |                                        |
| TRYPS   | DDQNPSSNICNISCDK                           |                                        |
| TRYPS   | FLDDDLTDDIMCVK                             |                                        |
| TRYPS   | ILDK                                       |                                        |
| TRYPS   | VGINYWLAHK                                 |                                        |
| TRYPS   | ALCSEK                                     |                                        |
| TRYPS   | LDQWLCEK                                   |                                        |
| CH-HI   | EQLTKCEVF                                  |                                        |
| CH-HI   | RELKDLKGY                                  |                                        |
| CH-HI   | GGVSLPEW                                   |                                        |
| CH-HI   | VCTTF                                      |                                        |
| CH-HI   | HTSGY                                      |                                        |

|        |                                                                    |   |
|--------|--------------------------------------------------------------------|---|
| CH-HI  | DTQAIVQNNDSTEY                                                     |   |
| CH-HI  | GLF                                                                |   |
| CH-HI  | QINNKIW                                                            |   |
| CH-HI  | CKDDQNPSSNICNISCDF                                                 |   |
| CH-HI  | LDDDLTDDIMCVKKILDKVGINY                                            |   |
| CH-HI  | LAHKALCSEKLDQW                                                     |   |
| CH-HI  | LCEKL                                                              |   |
| CH-LO  | EQL                                                                |   |
| CH-LO  | TKCEVF                                                             |   |
| CH-LO  | REL                                                                |   |
| CH-LO  | KDL                                                                |   |
| CH-LO  | KGY                                                                |   |
| CH-LO  | GGVSLPEW                                                           |   |
| CH-LO  | VCTTF                                                              |   |
| CH-LO  | TSGY                                                               |   |
| CH-LO  | DTQAIVQNNDSTEY                                                     |   |
| CH-LO  | GL                                                                 | ✓ |
| CH-LO  | QINNKIW                                                            |   |
| CH-LO  | CKDDQNP                                                            |   |
| CH-LO  | SSNICNISCDF                                                        |   |
| CH-LO  | DDL                                                                |   |
| CH-LO  | TDDIM                                                              |   |
| CH-LO  | CVKKIL                                                             |   |
| CH-LO  | DKVGINY                                                            |   |
| CH-LO  | AH                                                                 | ✓ |
| CH-LO  | KAL                                                                |   |
| CH-LO  | CSEKL                                                              |   |
| CH-LO  | DQW                                                                |   |
| CH-LO  | CEKL                                                               |   |
| GLUEND | QLTKCE                                                             |   |
| GLUEND | VFRE                                                               |   |
| GLUEND | LKDLKGYGGVSLPE                                                     |   |
| GLUEND | WVCTTFHTSGYDTQAIVQNNDSTE                                           |   |
| GLUEND | YGLFQINNKIWCKDDQNPSSNICNISCDFLDDDLTDDIMCVKKILDKV<br>GINYWLAHKALCSE |   |
| GLUEND | KLDQWLCE                                                           |   |
| GLUEND | KL                                                                 | ✓ |

\*PEPS: pepsin pH 1.3; PEPS2: pepsin pH > 2; TRYPS: trypsin; CH-HI: chymotrypsin high specificity; CH-LO: chymotrypsin low specificity; GLUEND: glutamyl endopeptidase.

\*\*Peptide sequence abbreviated with the one letter amino acid code.

**Supplementary Table S3.** Peptide sequences identified by LC-MS within the  $\alpha$ -lactalbumin ( $\alpha$ -La) H9 and its associated simulated gastrointestinal digest (SGID) sample, which present structural features of known dipeptidyl peptidase IV inhibitory peptides (i.e., W at the N-terminus, P/A at position 2 or P at the C-terminus [1-3](#)). These peptides have not previously been evaluated for their DPP-IV inhibitory potential, therefore, their DPP-IV inhibitory properties are not known.

| Feature         | Peptide sequence* | Parent protein** | Fragment   | Identified in |            |
|-----------------|-------------------|------------------|------------|---------------|------------|
|                 |                   |                  |            | H9            | SGID of H9 |
| N-terminal W    | WGAVLL            |                  |            |               | ✓          |
|                 | WGLF              |                  |            |               | ✓          |
| P at position 2 | EPMLGV            |                  |            |               | ✓          |
|                 | HPHAY             |                  |            | ✓             |            |
|                 | KPTPE             | $\beta$ -Lg      | f(47-51)   |               | ✓          |
|                 | KPTPEGDL          | $\beta$ -Lg      | f(47-54)   |               | ✓          |
|                 | KPTPEGDLE         | $\beta$ -Lg      | f(47-55)   |               | ✓          |
|                 | KPTPEGDLEL        | $\beta$ -Lg      | f(47-56)   |               | ✓          |
|                 | KPTPEGDLEI        | $\beta$ -Lg      | f(47-56)   |               | ✓          |
|                 | MPEATLGAAFKF      |                  |            | ✓             |            |
|                 | MPEGGKKPM         |                  |            | ✓             |            |
|                 | MPFSPPRA          |                  |            | ✓             |            |
|                 | MPKEQDSVY         |                  |            |               | ✓          |
|                 | MPPEV             |                  |            |               | ✓          |
|                 | MPVVCLSQM         |                  |            | ✓             |            |
|                 | PPVSLPADE         |                  |            |               | ✓          |
|                 | QPQSQ             |                  |            | ✓             |            |
|                 | SPPSVT            |                  |            | ✓             |            |
|                 | TPEVD             | $\beta$ -Lg      | f(125-129) |               | ✓          |
|                 | TPEVDD            | $\beta$ -Lg      | f(125-130) |               | ✓          |
|                 | TPEVDDE           | $\beta$ -Lg      | f(125-131) |               | ✓          |
|                 | TPEVDDEA          | $\beta$ -Lg      | f(125-132) |               | ✓          |
| TPEVDDEAL       | $\beta$ -Lg       | f(125-133)       |            | ✓             |            |
| TPEVDDEALE      | $\beta$ -Lg       | f(125-134)       |            | ✓             |            |
| TPEVDDEALEK     | $\beta$ -Lg       | f(125-135)       |            | ✓             |            |

|                 |                    |                   |            |   |   |
|-----------------|--------------------|-------------------|------------|---|---|
| A at position 2 | TPLPL              |                   |            |   | ✓ |
|                 | VPYPQ              | $\beta$ -CN       | f(178-182) |   | ✓ |
|                 | YPSYG              | $\kappa$ -CN      | f(35-39)   | ✓ |   |
|                 | NPWDQV             | $\alpha_{s2}$ -CN | f(107-112) | ✓ | ✓ |
|                 | AAAFKALAEAGL       |                   |            | ✓ |   |
|                 | AANTVYPL           |                   |            |   | ✓ |
|                 | AATVALL            |                   |            |   | ✓ |
|                 | CAGLDLQ            |                   |            | ✓ |   |
|                 | DAGLLV             |                   |            |   | ✓ |
|                 | DAFLGSFLYEYSR      | BSA               | f(329-341) | ✓ |   |
|                 | DAIPENLPPLTA       | BSA               | f(301-312) | ✓ |   |
|                 | DALNEN             | $\beta$ -Lg       | f(85-90)   |   | ✓ |
|                 | DAQSAPL            | $\beta$ -Lg       | f(33-39)   |   | ✓ |
|                 | EAAVK              |                   |            | ✓ |   |
|                 | EAGLV              |                   |            |   | ✓ |
|                 | EALPH              |                   |            |   | ✓ |
|                 | EASVPE             |                   |            |   | ✓ |
|                 | FAGKN              |                   |            |   | ✓ |
|                 | FASQY              |                   |            | ✓ |   |
|                 | LAPHCDKL           |                   |            | ✓ |   |
|                 | LAPPQEEL           |                   |            |   | ✓ |
|                 | LAQSVT             |                   |            |   | ✓ |
|                 | LAQSVTLNSYVQLGVLPR |                   |            |   | ✓ |
|                 | MAGGGGLV           |                   |            |   | ✓ |
|                 | MAGSASP            |                   |            | ✓ |   |
|                 | MAGSGGRL           |                   |            | ✓ |   |
|                 | MALPPK             | $\kappa$ -CN      | f(106-111) | ✓ |   |
|                 | MALRN              |                   |            | ✓ |   |
|                 | MAVLVL             |                   |            | ✓ |   |
|                 | RATDATAL           |                   |            | ✓ |   |
|                 | SAEPEQS            | $\beta$ -Lg       | f(110-106) |   | ✓ |
|                 | SAPFPS             |                   |            | ✓ |   |
| SAPSVT          |                    |                   | ✓          |   |   |
| SASSPLLSTK      |                    |                   | ✓          |   |   |
| TASSGLT         |                    |                   | ✓          |   |   |

|              |                 |                   |            |   |   |
|--------------|-----------------|-------------------|------------|---|---|
| C-terminal P | TAVQGSKP        |                   |            | ✓ |   |
|              | VAGTK           |                   |            | ✓ |   |
|              | VAPFDPLFG       |                   |            |   | ✓ |
|              | VAPFPEV         | $\alpha_{s1}$ -CN | f(25-31)   |   | ✓ |
|              | VAPFTVSNAG      |                   |            |   | ✓ |
|              | VAYGGV          |                   |            |   | ✓ |
|              | YAASSYLSLTSSDWK |                   |            | ✓ |   |
|              | YAKPA           | $\kappa$ -CN      | f(61-65)   | ✓ |   |
|              | AVGEPLP         |                   |            |   | ✓ |
|              | EMPFKP          |                   |            | ✓ |   |
|              | ESGPSLVSKP      |                   |            |   | ✓ |
|              | FLAAFMP         |                   |            |   | ✓ |
|              | FNTP            |                   |            | ✓ |   |
|              | FYDP            |                   |            |   | ✓ |
|              | HKKP            |                   |            | ✓ | ✓ |
|              | HLPLP           | $\beta$ -CN       | f(134-138) |   | ✓ |
|              | HYTALP          |                   |            | ✓ |   |
|              | LFPGNTSVKP      |                   |            |   | ✓ |
|              | LGGPGLP         |                   |            |   | ✓ |
|              | LVVHP           |                   |            |   | ✓ |
|              | LVYFPGLP        |                   |            |   | ✓ |
|              | MHQHP           |                   |            | ✓ |   |
|              | NKPALAGMP       |                   |            | ✓ |   |
|              | NMMDVGVMVP      |                   |            |   | ✓ |
|              | SELSALP         |                   |            |   | ✓ |
|              | SVYFPGLP        |                   |            | ✓ |   |
|              | TAVQGSKP        |                   |            | ✓ |   |
|              | TFDLP           |                   |            |   | ✓ |
|              | TMTLGTFP        |                   |            |   | ✓ |
|              | VSGGLP          |                   |            | ✓ |   |
|              | VTHFP           |                   |            |   | ✓ |
|              | VVAGALLPP       |                   |            | ✓ |   |
| SLELYP       |                 |                   | ✓          |   |   |

\*Peptide sequences abbreviated with the one letter amino acid code.

\*\* $\beta$ -Lg:  $\beta$ -lactoglobulin; BSA: bovine serum albumin; CN: casein

1. G. Tulipano, L. Faggi, A. Nardone, D. Cocchi and A. M. Caroli, *Int. Dairy J.*, 2015, **48**, 62-72.
2. A. B. Ngonierma and R. J. FitzGerald, *Food Chem.*, 2014, **165**, 489–498.
3. A. B. Ngonierma and R. J. FitzGerald, *J. Funct. Foods*, 2013, **5**, 1909–1917.

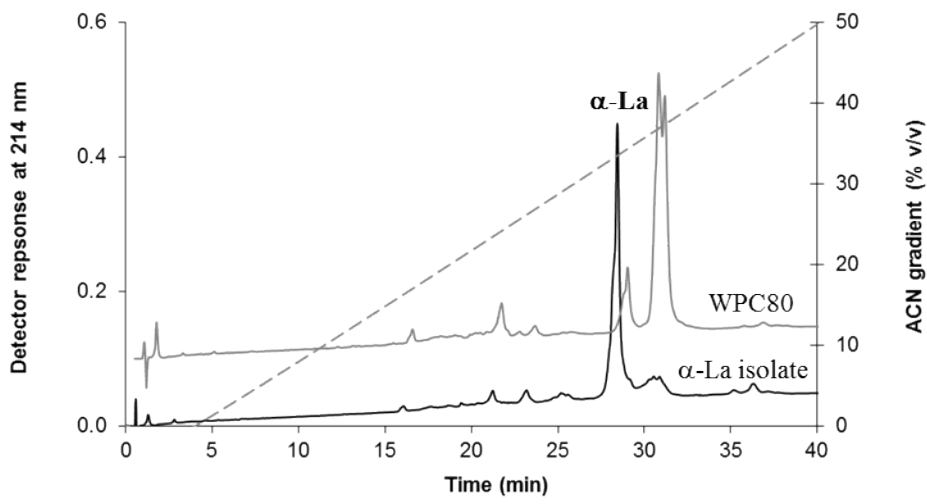

**Supplementary Fig. S1.** Reverse phase ultra-performance liquid chromatographic (RP-UPLC) profile of the whey protein concentrate 80 (WPC 80) and the  $\alpha$ -lactalbumin ( $\alpha$ -La) isolate.



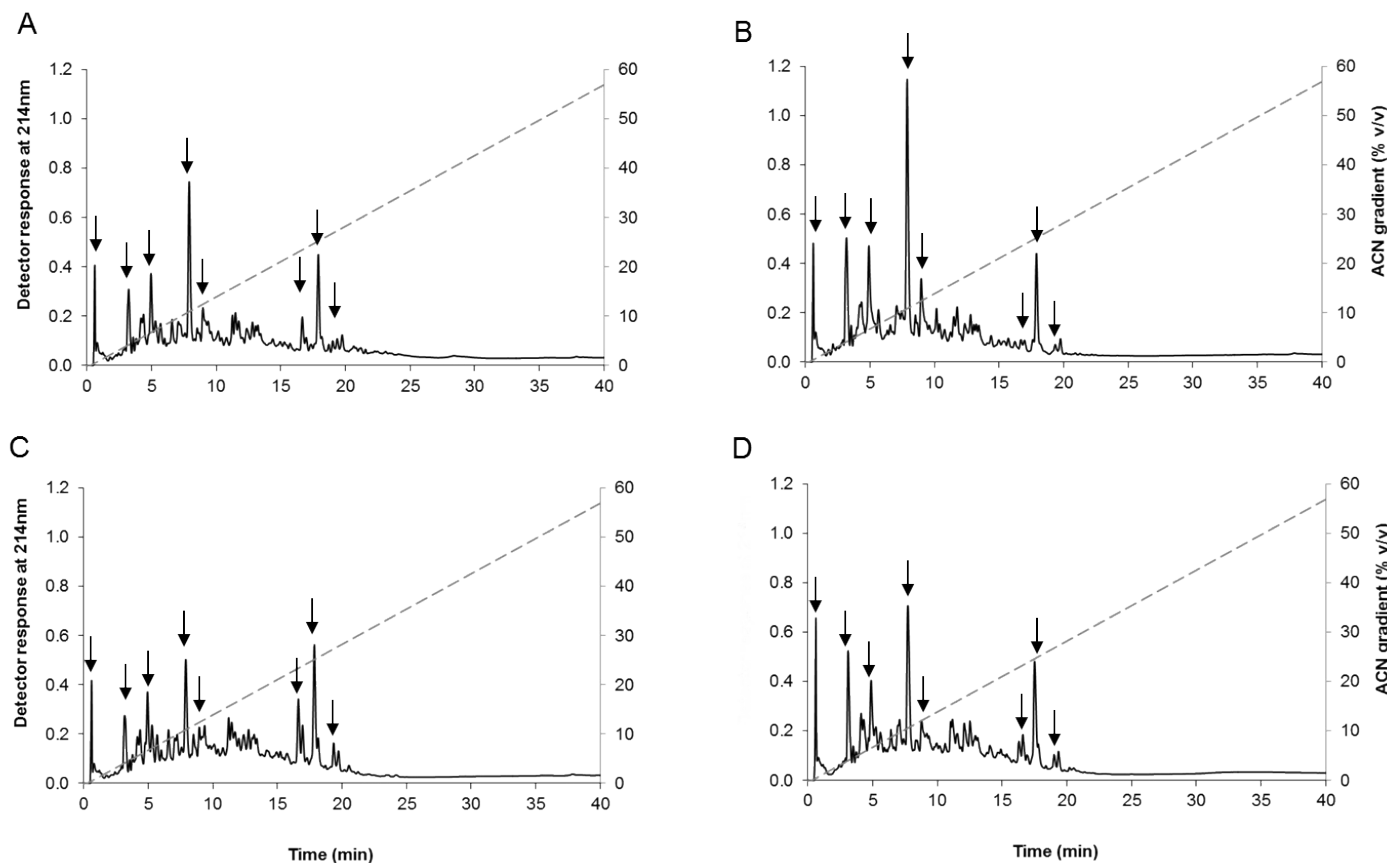

The peptide profiles (RP-UPLC) of H4, H7, H8 and H9 are depicted on Supplementary Fig. S3A-S3D, respectively. Only minor differences were seen on incubation at 37 (H4, Supplementary Fig. S3A) compared to 50 °C (H9, Supplementary Fig. S3D). At higher E:S, peaks eluting before 10 min were more intense (H9 vs. H7, Supplementary Fig. S3D and S3C, respectively). Certain peaks eluting before 10 min were more intense at pH 7.0 (H8, Supplementary Fig. S3B), than at pH 8.0 (H9, Supplementary Fig. S3D).

**Supplementary Fig. S2.** Reverse phase ultra-performance liquid chromatographic (RP-UPLC) profile of the  $\alpha$ -lactalbumin ( $\alpha$ -La) hydrolyzates generated with elastase at (A) pH 8.5, 37°C, E:S 2% (H4), (B) pH 7.0, 50°C, E:S 2% (H7), (C) pH 8.5, 50°C, E:S 1% (H8) and (D) pH 8.5, 50°C, E:S 2% (H9). Peptide peaks highlighted with an arrow show major differences within the hydrolyzates.
